# Supplementary material for: Development of a Smartphone-Integrated Reflective Scatterometer for Bacterial Identification
Source: MDPI journal article supplement (doi:10.3390/s22072646), 2022-03-30
Supplement: s1 [file s1]

# Development of a Smartphone-Integrated Reflective Scatterometer for Bacterial Identification

Iyll-Joon Doh <sup>1</sup>, Brianna Dowden <sup>2</sup>, Valery Patsekin <sup>2</sup>, Bartek Rajwa <sup>3</sup>, J. Paul Robinson <sup>2,4</sup> and Euiwon Bae <sup>1,\*</sup>

<sup>1</sup> Applied Optics Laboratory, School of Mechanical Engineering, Purdue University, West Lafayette, IN 47907, USA; idoh@purdue.edu

<sup>2</sup> Basic Medical Science, College of Veterinary Medicine, Purdue University, West Lafayette, IN 47907, USA; dowdenb@purdue.edu (B.D.); valerythe1@gmail.com (V.P.); jpr@cyto.purdue.edu (J.P.R.)

<sup>3</sup> Bindley Bioscience Center, Purdue University, West Lafayette, IN 47907, USA; brajwa@purdue.edu

<sup>4</sup> Weldon School of Biomedical Engineering, Purdue University, West Lafayette, IN 47907, USA

\* Correspondence: ebae@purdue.edu

## Supplementary Materials:

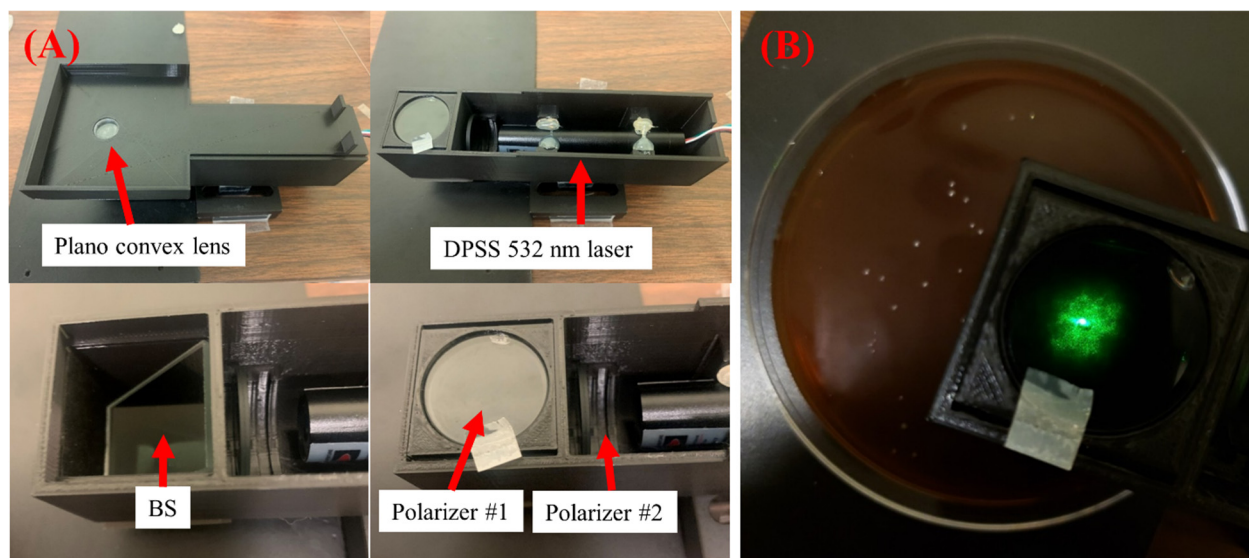

**Figure S1.** More pictures of the proposed instrument. (A) Pictures showing each component of the proposed instrument, (B) A picture of the instrument without the smartphone and top cover, measuring the reflective ELS pattern of *E. coli* colony on BHI with 5% horse blood agar.

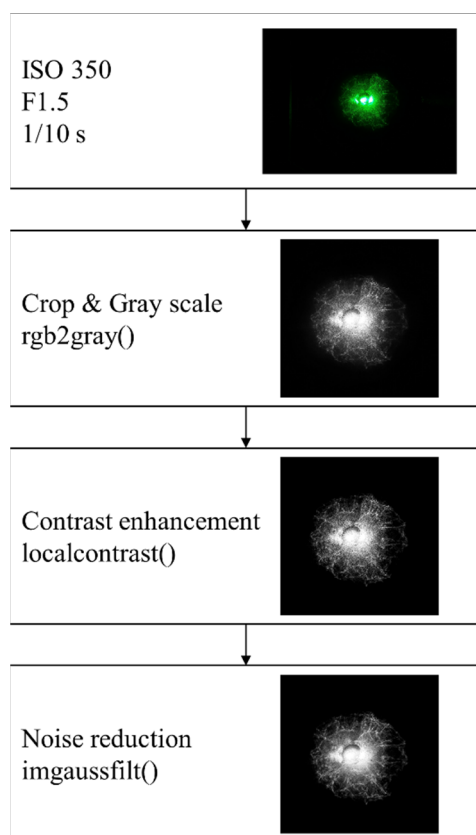

**Figure S2.** Image pre-processing procedure and corresponding setting or MATLAB functions utilized. Example pattern images showing the changes made from each step are attached.

Matlab function, “`rgb2gray(RGB)`” converts the RGB image to grayscale image by eliminating the hue and saturation information while retaining the luminance. “`localcontrast()`”, is an edge-aware local contrast manipulation of images, which enhances or flattens the local contrast of an image by increasing or smoothing details while leaving strong edges unchanged. “`imgaussfilt()`” is a 2-D Gaussian filtering function that filters an image with a 2-D Gaussian smoothing kernel with specified standard deviation. Details of the Matlab functions can be found on Matlab website.

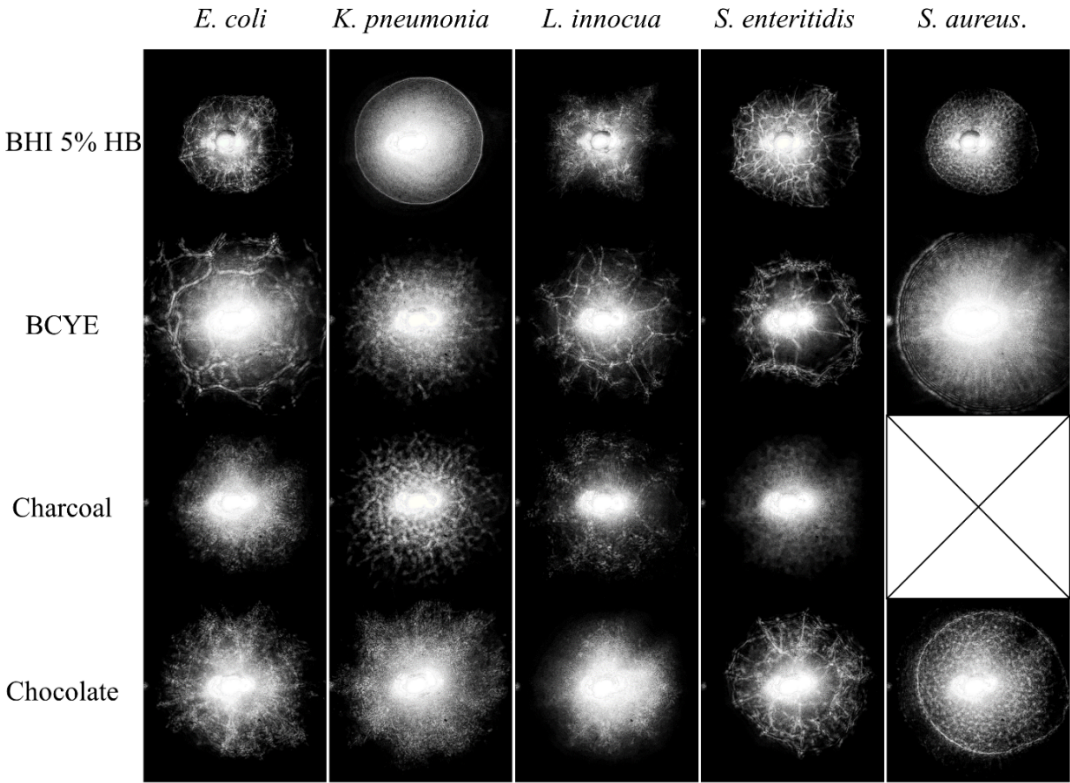

**Figure S3.** Representative reflective ELS pattern images of the five bacteria grown on various nutrition media. The rows represent the media type, and the columns represent the bacterial species.

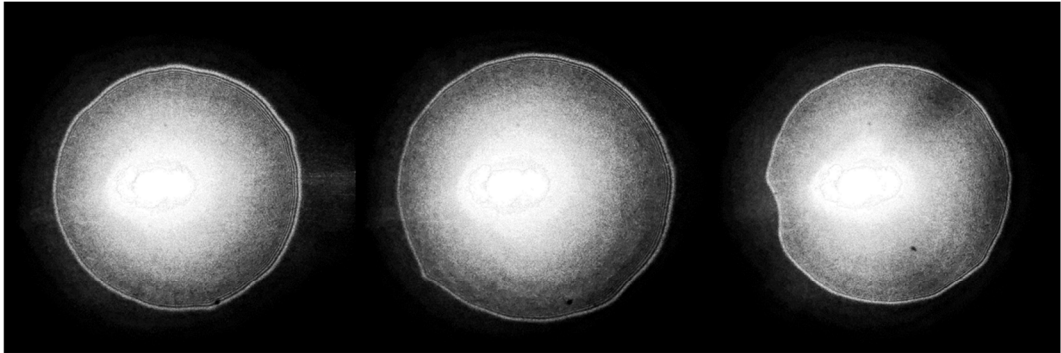

**(A)**

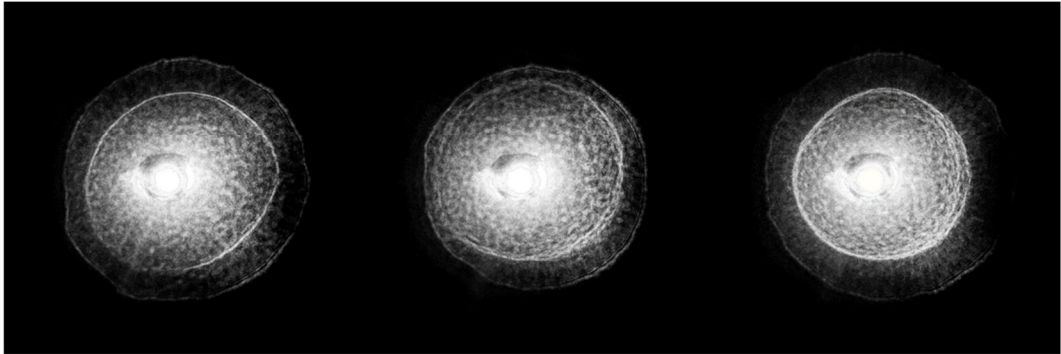

**(B)**

**Figure S4.** The comparison between mucoid and non-mucoid bacterial colonies with their reflective ELS patterns. The reflective ELS patterns of *K. pneumoniae* that formed **(A)** mucoid and **(B)** non-mucoid colonies.

**Table S1.** List of the optical scattering/diffraction technologies for bacterial identification and their specifications.

|                         | Laser wavelength | Pattern type | Target sample          | Detector              | Features                                                                | Classifier                          | Ref. |
|-------------------------|------------------|--------------|------------------------|-----------------------|-------------------------------------------------------------------------|-------------------------------------|------|
| <i>Bae et al</i>        | 635 nm           | Transmitted  | Foodborne pathogen     | CMOS                  | Haralick texture<br>Zernike                                             | SVM                                 | [3]  |
| <i>Marcoux et al</i>    | 543.5 nm         | Transmitted  | Clinical               | CCD                   | Zernike invariant                                                       | Bayes Network<br>Naïve Bayes<br>SMO | [4]  |
| <i>Minori et al</i>     | Not specified    | Transmitted  | Urinary tract pathogen | Not specified         | NA                                                                      | NA                                  | [5]  |
| <i>Buzdlewicz et al</i> | 635 nm           | Transmitted  | Clinical               | CCD                   | Mean<br>Entropy<br>Radius<br>Standard deviation<br>Flatness<br>Skewness | LDA<br>QDA<br>SVM                   | [6]  |
| <i>Pan et al</i>        | 980 nm           | Transmitted  | Foodborne pathogen     | Screen<br>NIR camera  | Zernike invariant                                                       | LDA<br>KNN<br>PLSDA<br>BPANN        | [8]  |
| <i>Kim et al</i>        | 532 nm           | Reflected    | Foodborne pathogen     | Screen<br>DSLR camera | Haralick texture<br>Zernike invariant                                   | SVM                                 | [9]  |

**Table S2.** The cross-validation matrices show the classification result of the five bacteria grown on BHI with 5% horse blood, BCYE, and chocolate agar plates.

| BHI 5% HB             | <i>E. coli</i> | <i>K.pneumoniae</i> | <i>L. innocua</i> | <i>S. enteritidis</i> | <i>S. aureus</i> |
|-----------------------|----------------|---------------------|-------------------|-----------------------|------------------|
| <i>E. coli</i>        | 97.1           | 0                   | 0                 | 2.9                   | 0                |
| <i>K. pneumonia</i>   | 0              | 100                 | 0                 | 0                     | 0                |
| <i>L. innocua</i>     | 0              | 0                   | 100               | 0                     | 0                |
| <i>S. enteritidis</i> | 3.3            | 0                   | 0                 | 96.7                  | 0                |
| <i>S. aureus</i>      | 0              | 0                   | 0                 | 0                     | 100              |
| BCYE                  | <i>E. coli</i> | <i>K.pneumoniae</i> | <i>L. innocua</i> | <i>S. enteritidis</i> | <i>S. aureus</i> |
| <i>E. coli</i>        | 83.9           | 0                   | 9.2               | 0                     | 6.9              |
| <i>K. pneumonia</i>   | 0              | 93.7                | 1.8               | 0                     | 4.5              |
| <i>L. innocua</i>     | 9.8            | 0                   | 90                | 0                     | 0.2              |
| <i>S. enteritidis</i> | 0              | 0                   | 2.1               | 97.9                  | 0                |
| <i>S. aureus</i>      | 0              | 0                   | 0                 | 0                     | 100              |
| Chocolate             | <i>E. coli</i> | <i>K.pneumoniae</i> | <i>L. innocua</i> | <i>S. enteritidis</i> | <i>S. aureus</i> |
| <i>E. coli</i>        | 90.6           | 0.8                 | 0                 | 3.8                   | 4.9              |
| <i>K. pneumonia</i>   | 8.7            | 90.4                | 0                 | 0.9                   | 0                |
| <i>L. innocua</i>     | 0              | 0.4                 | 98.9              | 0.1                   | 0.6              |
| <i>S. enteritidis</i> | 6.7            | 5                   | 0                 | 85.5                  | 2.8              |
| <i>S. aureus</i>      | 2.1            | 0                   | 0                 | 0.7                   | 97.2             |

**Table S3.** The cross-validation matrix and the five statistical parameters for the four bacteria grown on charcoal agar plates. Since *S. aureus* did not grow on this media, only four bacteria were classified.

|                       | <i>E. coli</i> | <i>K.pneumoniae</i> | <i>L. innocua</i> | <i>S. enteritidis</i> |
|-----------------------|----------------|---------------------|-------------------|-----------------------|
| <i>E. coli</i>        | 90.9           | 0                   | 9.1               | 0                     |
| <i>K. pneumonia</i>   | 0              | 100                 | 0                 | 0                     |
| <i>L. innocua</i>     | 0              | 0.1                 | 99.9              | 0                     |
| <i>S. enteritidis</i> | 0              | 0                   | 9.6               | 90.4                  |
|                       | <i>E. coli</i> | <i>K.pneumoniae</i> | <i>L. innocua</i> | <i>S. enteritidis</i> |
| Accuracy              | 97.7           | 100                 | 95.3              | 97.6                  |
| Sensitivity           | 90.9           | 100                 | 99.9              | 90.4                  |
| Specificity           | 100            | 100                 | 93.8              | 100                   |
| PPV                   | 100            | 99.9                | 84.2              | 100                   |
| NPV                   | 97.1           | 100                 | 100               | 96.9                  |
